# Supplementary material for: MEG-Based Detection of Voluntary Eye Fixations Used to Control a Computer
Source: Frontiers journal article supplement (doi:10.3389/fnins.2021.619591), 2021-02-05
Supplement: Data_Sheet_1.PDF [file Data_Sheet_1.PDF]

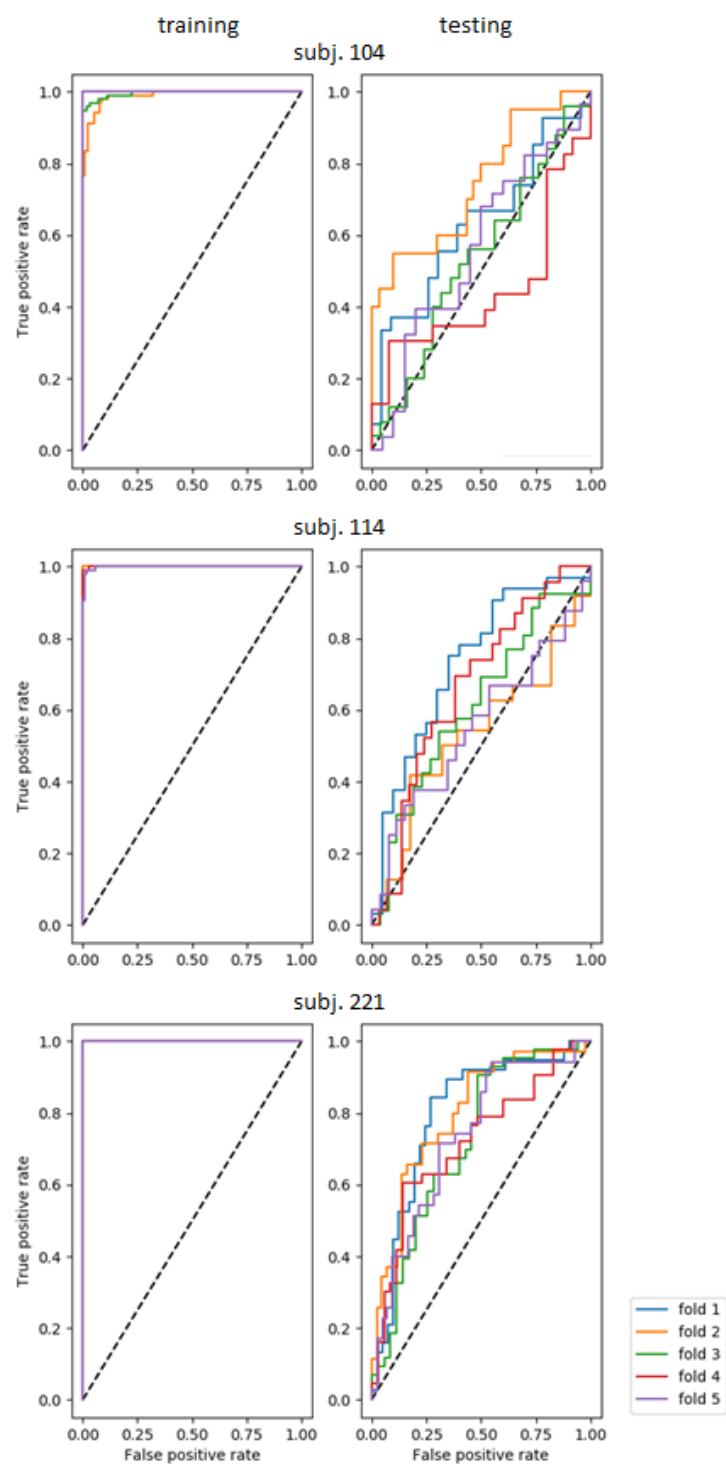

**Supplementary Figure 1.** ROC AUC curves for each fold of training (left) and testing (right) procedures, obtained on datasets of three subjects. Some lines may not be visible if they coincide with lines drawn on top of them.

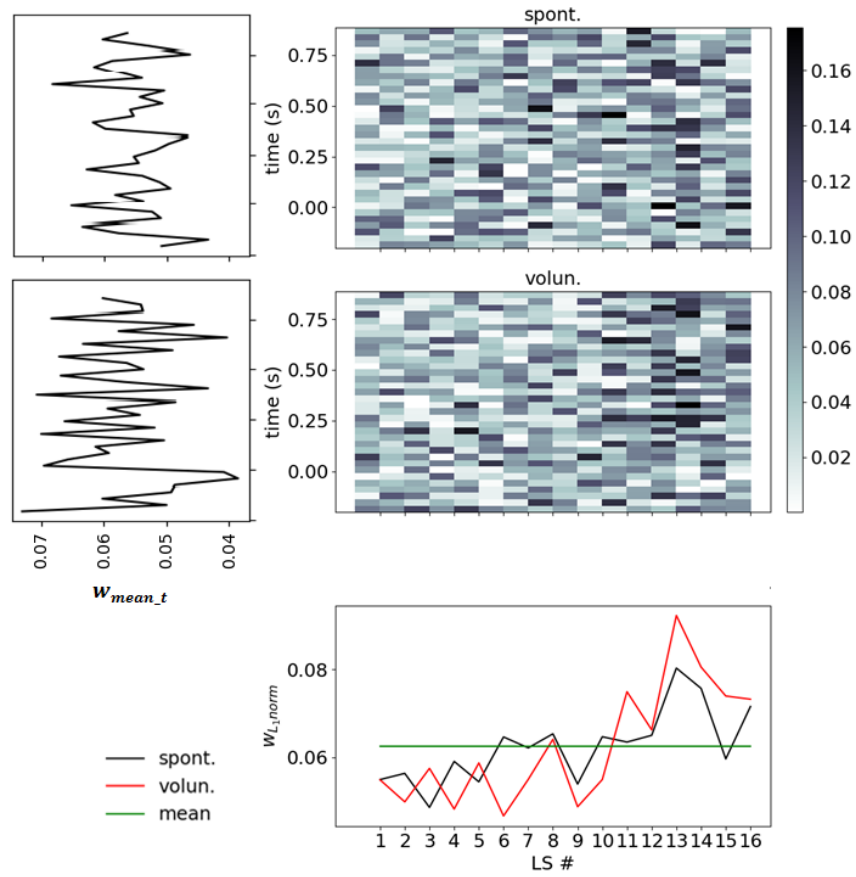

**Supplementary Figure 2.** Output weights of LF-CNN learned on participant 114 data in time interval -0.2 ... 1.0 s for spontaneous and voluntary classes (top and middle, respectively), LS' weights for each class according to Equation 4, where proportion of the L1-norm of output weights over time points in total sum of L1-norms of all LSs (bottom), averaged weights in every time point over all LSs (left).

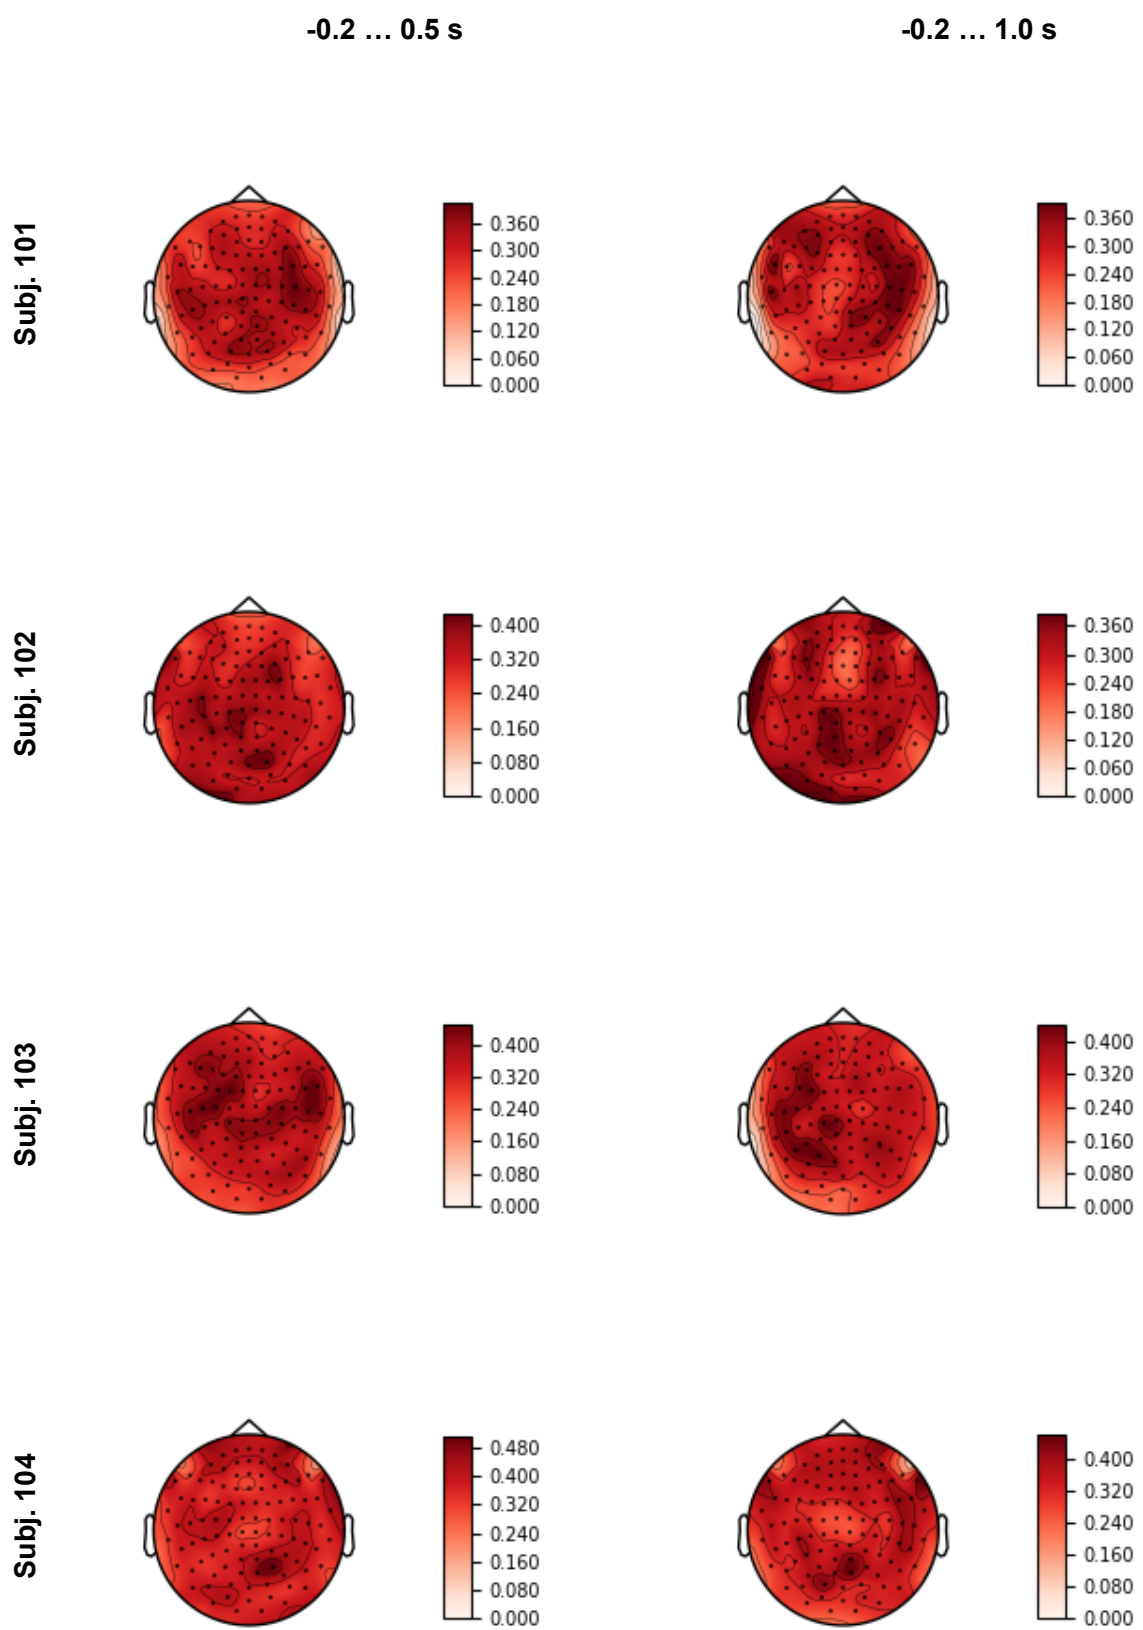

Subj. 106

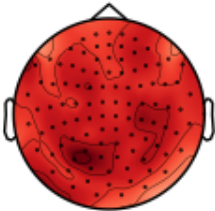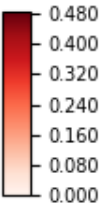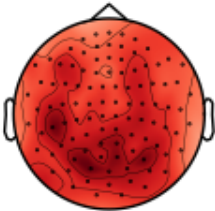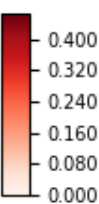

Subj. 107

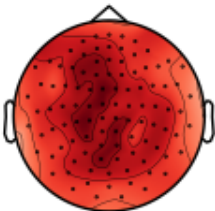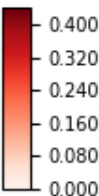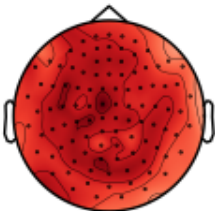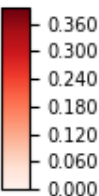

Subj. 108

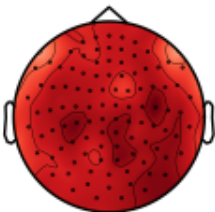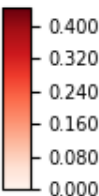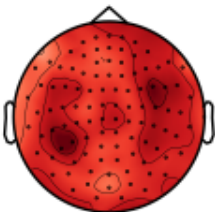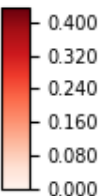

Subj. 109

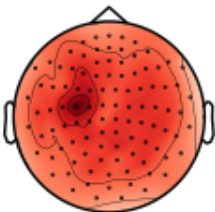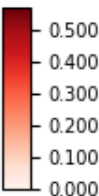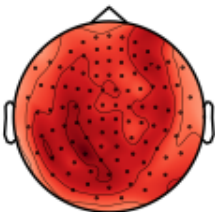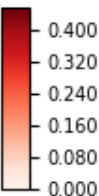

Subj. 110

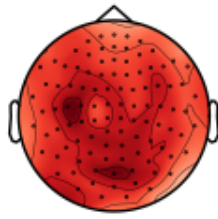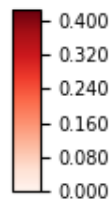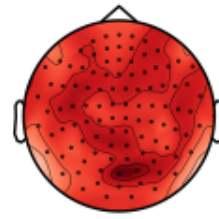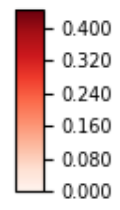

Subj. 113

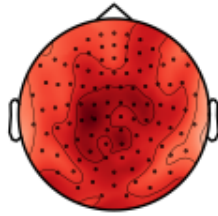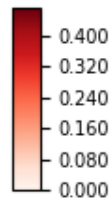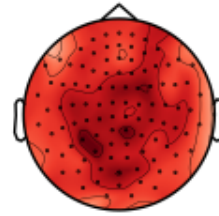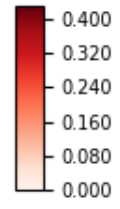

Subj. 115

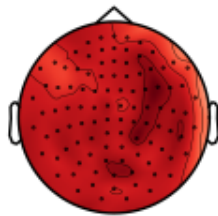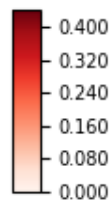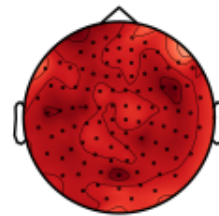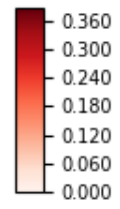

Subj. 203

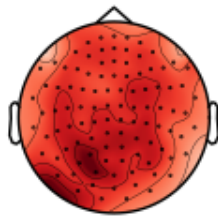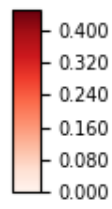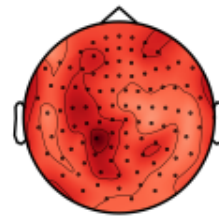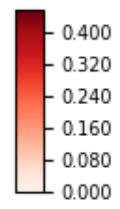

Subj. 204

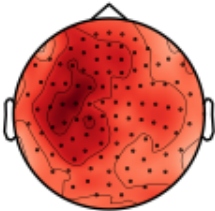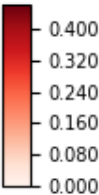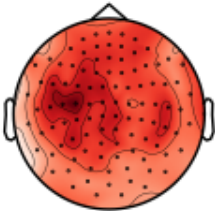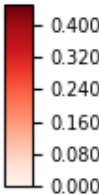

Subj. 213

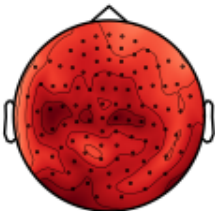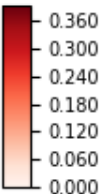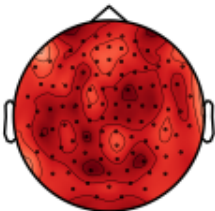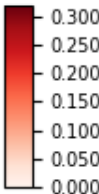

Subj. 214

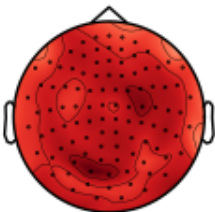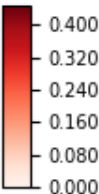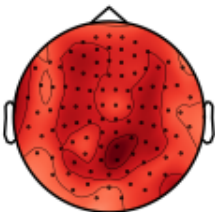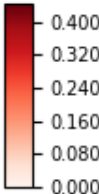

Subj. 215

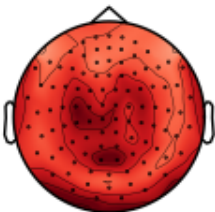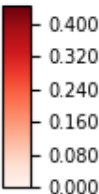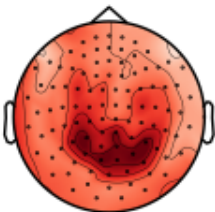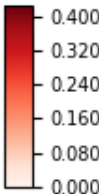

Subj. 216

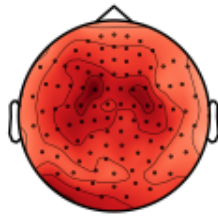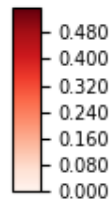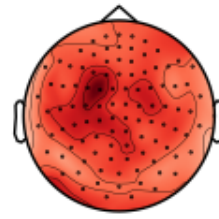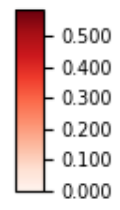

Subj. 217

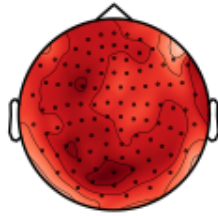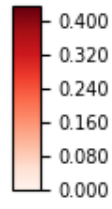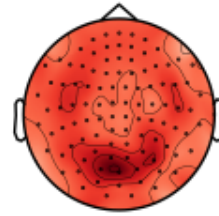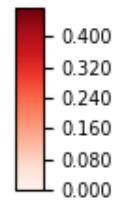

Subj. 218

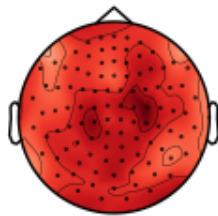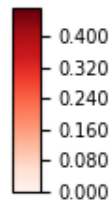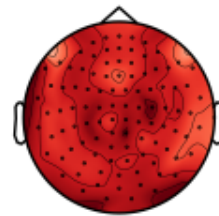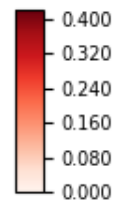

Subj. 222

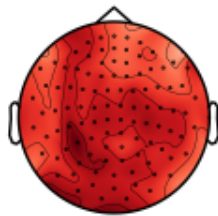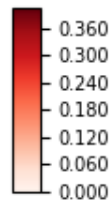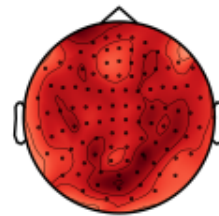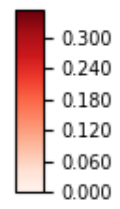

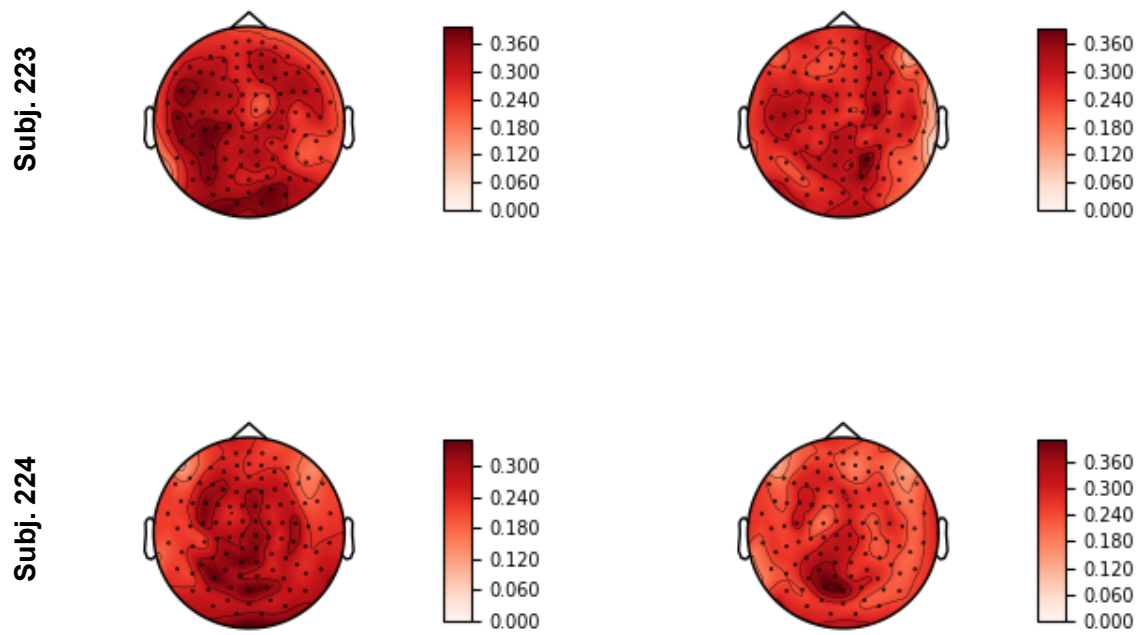

**Supplementary Figure 3.** Topographical maps of full explained variance fraction (FVE) for the participants which were not shown in Figure 4 in the main text.
