# Supplementary material for: MEG-Based Detection of Voluntary Eye Fixations Used to Control a Computer
Source: Frontiers journal article supplement (doi:10.3389/fnins.2021.619591), 2021-02-05
Supplement: Table_1.PDF [file Table_1.PDF]

**Supplementary Table 1.** Individual classification performance of VAR-CNN for 25 participants. AUCs computed for the test subsets on time interval  $-0.2 \dots 0.5$  s using the naïve and ensemble testing procedures are denoted as  $AUC_{naïve}$  and  $AUC_{ensemble}$ , respectively.  $AUC_{val}$  corresponds to mean AUC over cross-validation folds. All AUCs values are presented as  $M \pm SD$  computed over cross-validation and tests folds (for details see *CNN testing algorithms* in the main text). "+" denotes the participants with  $p < 0.05$  on all testing folds ( $H_0$  hypothesis was always rejected, i.e., the difference from random performance was found for all folds) for both testing procedures. "-" denotes the participants with  $p > 0.05$  on all testing folds ( $H_0$  hypothesis was always accepted, i.e., the difference from random performance was not found for any fold) for both testing procedures.

| Subj. ID | Number of trials per class | Performance on original data |                      |                         | Result of permutation test |
|----------|----------------------------|------------------------------|----------------------|-------------------------|----------------------------|
|          |                            | AUC <sub>val</sub>           | AUC <sub>naïve</sub> | AUC <sub>ensemble</sub> |                            |
| 101      | 104                        | 0.69±0.03                    | 0.65±0.10            | 0.62±0.09               |                            |
| 102      | 133                        | 0.75±0.02                    | 0.71±0.04            | 0.70±0.03               | +                          |
| 103      | 110                        | 0.70±0.04                    | 0.70±0.02            | 0.70±0.05               |                            |
| 104      | 123                        | 0.64±0.02                    | 0.58±0.09            | 0.57±0.10               |                            |
| 106      | 119                        | 0.63±0.02                    | 0.64±0.08            | 0.62±0.11               |                            |
| 107      | 141                        | 0.69±0.04                    | 0.68±0.05            | 0.70±0.04               | +                          |
| 108      | 100                        | 0.66±0.06                    | 0.60±0.11            | 0.59±0.12               |                            |
| 109      | 95                         | 0.78±0.04                    | 0.76±0.05            | 0.75±0.06               | +                          |
| 110      | 150                        | 0.72±0.03                    | 0.68±0.05            | 0.68±0.06               |                            |
| 113      | 97                         | 0.68±0.06                    | 0.59±0.04            | 0.58±0.07               | –                          |
| 114      | 129                        | 0.69±0.04                    | 0.67±0.04            | 0.68±0.06               |                            |
| 115      | 101                        | 0.67±0.05                    | 0.70±0.07            | 0.69±0.09               |                            |
| 202      | 205                        | 0.76±0.02                    | 0.72±0.06            | 0.73±0.04               | +                          |
| 203      | 217                        | 0.75±0.02                    | 0.72±0.03            | 0.72±0.04               | +                          |
| 204      | 124                        | 0.68±0.04                    | 0.63±0.07            | 0.67±0.06               |                            |
| 213      | 111                        | 0.71±0.03                    | 0.71±0.09            | 0.71±0.09               |                            |
| 214      | 70                         | 0.68±0.02                    | 0.63±0.09            | 0.63±0.08               |                            |
| 215      | 177                        | 0.73±0.02                    | 0.71±0.09            | 0.72±0.11               |                            |
| 216      | 81                         | 0.58±0.04                    | 0.49±0.07            | 0.49±0.07               | –                          |
| 217      | 157                        | 0.68±0.02                    | 0.72±0.04            | 0.67±0.05               |                            |
| 218      | 76                         | 0.62±0.03                    | 0.54±0.10            | 0.54±0.12               | –                          |
| 221      | 196                        | 0.73±0.02                    | 0.74±0.05            | 0.74±0.05               | +                          |
| 222      | 165                        | 0.75±0.03                    | 0.72±0.03            | 0.71±0.02               | +                          |
| 223      | 98                         | 0.75±0.02                    | 0.71±0.03            | 0.68±0.02               |                            |
| 224      | 137                        | 0.71±0.04                    | 0.74±0.04            | 0.74±0.03               | +                          |
| M ± SD   | 128±38                     | 0.70±0.05                    | 0.67±0.07            | 0.67±0.07               |                            |
